# Supplementary material for: Cognitive Therapy Versus Medication in Augmentation and Switch Strategies as Second-Step Treatments: A STAR*D Report
Source: Atypon-hosted journal article supplement (doi:10.1176/ajp.2007.164.5.739), 2007-05-01
Supplement: ajp_164_5_739_01.pdf [file ajp_164_5_739_01.pdf]

**Extended TABLE 1. Baseline Characteristics of STAR\*D Level 2 Participants Who Received Augmentation Treatments<sup>a</sup>**

| Characteristic                         | Augmentation Option |       |                          |       |                    |        | p      |
|----------------------------------------|---------------------|-------|--------------------------|-------|--------------------|--------|--------|
|                                        | Total (N=182)       |       | Cognitive Therapy (N=65) |       | Medication (N=117) |        |        |
|                                        | N                   | %     | N                        | %     | N                  | %      |        |
| Female                                 | 119                 | 65.4  | 41                       | 63.1  | 78                 | 66.7   | 0.6257 |
| Race                                   |                     |       |                          |       |                    |        | 0.5701 |
| White                                  | 151                 | 83.0  | 52                       | 80.0  | 99                 | 84.6   |        |
| Black                                  | 24                  | 13.2  | 11                       | 16.9  | 13                 | 11.1   |        |
| Other                                  | 7                   | 3.8   | 2                        | 3.1   | 5                  | 4.3    |        |
| Hispanic ethnicity                     | 23                  | 12.6  | 8                        | 12.3  | 15                 | 12.8   | 0.9205 |
| Employment status                      |                     |       |                          |       |                    |        | 0.2244 |
| Employed                               | 95                  | 52.2  | 35                       | 53.8  | 60                 | 51.3   |        |
| Unemployed                             | 81                  | 44.5  | 26                       | 40.0  | 55                 | 47.0   |        |
| Retired                                | 6                   | 3.3   | 4                        | 6.2   | 2                  | 1.7    |        |
| Medical insurance                      |                     |       |                          |       |                    |        | 0.5202 |
| Private                                | 98                  | 56.3  | 33                       | 52.4  | 65                 | 58.6   |        |
| Public                                 | 12                  | 6.9   | 6                        | 9.5   | 6                  | 5.4    |        |
| None                                   | 64                  | 36.8  | 24                       | 38.1  | 40                 | 36.0   |        |
| Marital status                         |                     |       |                          |       |                    |        | 0.9033 |
| Single                                 | 47                  | 25.8  | 16                       | 24.6  | 31                 | 26.5   |        |
| Married or cohabiting                  | 84                  | 46.2  | 30                       | 46.2  | 54                 | 46.2   |        |
| Divorced or separated                  | 45                  | 24.7  | 16                       | 24.6  | 29                 | 24.8   |        |
| Widowed                                | 6                   | 3.3   | 3                        | 4.6   | 3                  | 2.6    |        |
| Recurrent depression                   | 144                 | 85.2  | 50                       | 86.2  | 94                 | 84.7   | 0.7913 |
| Family history of depression           | 111                 | 61.7  | 44                       | 68.8  | 67                 | 57.8   | 0.1465 |
| Anxious features                       |                     | 21    | 35.6                     | 34    | 31.2               | 0.5618 |        |
| Atypical features                      |                     | 8     | 13.6                     | 26    | 23.6               | 0.1193 |        |
| Melancholic features                   |                     | 5     | 8.5                      | 9     | 8.2                | 1.0000 |        |
| Prior suicide attempt                  | 41                  | 22.5  | 14                       | 21.5  | 27                 | 23.1   | 0.8118 |
| Psychiatric Diagnostic Screening       |                     |       |                          |       |                    |        | 0.9844 |
| Questionnaire, number of comorbidities |                     |       |                          |       |                    |        |        |
| 1                                      | 61                  | 33.7  | 21                       | 32.3  | 40                 | 34.5   |        |
| 2                                      | 50                  | 27.6  | 19                       | 29.2  | 31                 | 26.7   |        |
| 3                                      | 31                  | 17.1  | 11                       | 16.9  | 20                 | 17.2   |        |
| ≥4                                     | 39                  | 21.5  | 14                       | 21.5  | 25                 | 21.6   |        |
| Psychiatric care                       | 129                 | 70.9  | 43                       | 66.2  | 86                 | 73.5   | 0.2956 |
| Duration of index episode ≥2 years     | 45                  | 24.7  | 19                       | 29.2  | 26                 | 22.2   | 0.2937 |
| Age <18 at first episode               | 73                  | 40.6  | 27                       | 42.2  | 46                 | 39.7   | 0.7405 |
|                                        | Mean                | SD    | Mean                     | SD    | Mean               | SD     |        |
| Age                                    | 40.0                | 12.8  | 40.6                     | 11.5  | 39.7               | 13.5   | 0.5588 |
| Education (years)                      | 14.1                | 3.1   | 14.1                     | 3.4   | 14.1               | 2.9    | 0.9929 |
| Monthly household income (\$)          | 2,623               | 2,928 | 2,319                    | 2,105 | 2,796              | 3,304  | 0.5208 |
| Age at first episode (years)           | 23.3                | 13.3  | 24.4                     | 13.8  | 22.6               | 13.0   | 0.4475 |
| Duration of illness (years)            | 16.7                | 12.5  | 16.3                     | 12.2  | 17.0               | 12.7   | 0.7501 |
| Number of episodes                     | 5.6                 | 9.4   | 7.3                      | 14.1  | 4.6                | 5.4    | 0.7398 |
| Cumulative Illness Rating Scale        |                     |       |                          |       |                    |        |        |
| Number of categories                   | 2.9                 | 2.3   | 3.2                      | 2.6   | 2.8                | 2.2    | 0.4393 |
| Total score                            | 3.9                 | 3.5   | 4.3                      | 3.8   | 3.7                | 3.3    | 0.3968 |
| Severity index                         | 1.1                 | 0.6   | 1.1                      | 0.6   | 1.1                | 0.5    | 0.8937 |
| Duration of index episode (months)     | 23.4                | 48.2  | 29.6                     | 49.4  | 20.0               | 47.5   | 0.6166 |

**Extended TABLE 1 (Continued)**

| Characteristic                                                           | Augmentation Option |    |                          |      |                    |      | p      |
|--------------------------------------------------------------------------|---------------------|----|--------------------------|------|--------------------|------|--------|
|                                                                          | Total (N=182)       |    | Cognitive Therapy (N=65) |      | Medication (N=117) |      |        |
|                                                                          | Mean                | SD | Mean                     | SD   | Mean               | SD   |        |
| Quality of Life and Enjoyment Satisfaction Questionnaire score           |                     |    | 41.8                     | 13.5 | 47.7               | 14.9 | 0.0202 |
| Short Form Health Survey (12-item)                                       |                     |    |                          |      |                    |      |        |
| Mental symptoms                                                          |                     |    | 31.0                     | 7.8  | 31.0               | 8.7  | 0.9967 |
| Physical symptoms                                                        |                     |    | 45.3                     | 13.7 | 49.7               | 11.0 | 0.0361 |
| Work and Social Adjustment Scale score <sup>b</sup>                      |                     |    | 25.1                     | 8.4  | 21.3               | 9.0  | 0.0155 |
| Hamilton Rating Scale for Depression score                               |                     |    | 17.8                     | 5.7  | 16.0               | 6.7  | 0.0962 |
| Inventory of Depressive Symptomatology—Clinician Rating score            |                     |    | 31.2                     | 10.3 | 29.2               | 11.9 | 0.2754 |
| Quick Inventory of Depressive Symptomatology—Clinician Rating (16-item)  |                     |    | 12.5                     | 4.0  | 12.5               | 4.2  | 0.9118 |
| Quick Inventory of Depressive Symptomatology—Self Rating (16-item) Score |                     |    | 11.9                     | 4.3  | 12.0               | 4.6  | 0.9495 |
| Change in score during Level 1 (%)                                       |                     |    | -6.2                     | 39.6 | -5.3               | 33.8 | 0.8606 |
|                                                                          |                     |    | N                        | %    | N                  | %    |        |
| Met remission criteria during Level 1                                    |                     |    | 2                        | 3.1  | 5                  | 4.3  | 1.0000 |
| Maximum side effect frequency in Level 1                                 |                     |    |                          |      |                    |      | 0.5544 |
| No side effects                                                          |                     |    | 11                       | 18.6 | 12                 | 12.0 |        |
| 10–25% of the time                                                       |                     |    | 18                       | 30.5 | 27                 | 27.0 |        |
| 50–75% of the time                                                       |                     |    | 17                       | 28.8 | 37                 | 37.0 |        |
| 90–100% of the time                                                      |                     |    | 13                       | 22.0 | 24                 | 24.0 |        |
| Maximum side effect intensity in Level 1                                 |                     |    |                          |      |                    |      | 0.5876 |
| No side effects                                                          |                     |    | 10                       | 16.9 | 10                 | 10.0 |        |
| Minimal to mild                                                          |                     |    | 15                       | 25.4 | 26                 | 26.0 |        |
| Moderate to marked                                                       |                     |    | 25                       | 42.4 | 50                 | 50.0 |        |
| Severe to intolerable                                                    |                     |    | 9                        | 15.3 | 14                 | 14.0 |        |
| Maximum side effect burden in Level 1                                    |                     |    |                          |      |                    |      | 0.4979 |
| No side effects                                                          |                     |    | 13                       | 22.0 | 13                 | 13.0 |        |
| Minimal to mild                                                          |                     |    | 24                       | 40.7 | 45                 | 45.0 |        |
| Moderate to marked                                                       |                     |    | 18                       | 30.5 | 36                 | 36.0 |        |
| Severe to intolerable                                                    |                     |    | 4                        | 6.8  | 6                  | 6.0  |        |
| Exited Level 1 because of intolerance                                    |                     |    | 4                        | 6.2  | 9                  | 7.7  | 0.7737 |

<sup>a</sup> Sums do not always equal N because of missing values. Percentages are based on available data.

<sup>b</sup> A higher score denotes less impairment.

**Extended TABLE 4. Baseline Characteristics of STAR\*D Level 2 Participants Who Received Switch Treatments<sup>a</sup>**

| Characteristic                         | Switch Option |      |                          |      |                   |      | p      |
|----------------------------------------|---------------|------|--------------------------|------|-------------------|------|--------|
|                                        | Total (N=122) |      | Cognitive Therapy (N=36) |      | Medication (N=86) |      |        |
|                                        | N             | %    | N                        | %    | N                 | %    |        |
| Female                                 | 75            | 61.5 | 22                       | 61.1 | 53                | 61.6 | 0.9573 |
| Race                                   |               |      |                          |      |                   |      | 0.4267 |
| White                                  | 91            | 74.6 | 28                       | 77.8 | 63                | 73.3 |        |
| Black                                  | 21            | 17.2 | 4                        | 11.1 | 17                | 19.8 |        |
| Other                                  | 10            | 8.2  | 4                        | 11.1 | 6                 | 7.0  |        |
| Hispanic ethnicity                     | 8             | 6.6  | 3                        | 8.3  | 5                 | 5.8  | 0.6924 |
| Employment status                      |               |      |                          |      |                   |      | 0.3487 |
| Employed                               | 74            | 61.2 | 19                       | 52.8 | 55                | 64.7 |        |
| Unemployed                             | 36            | 29.8 | 12                       | 33.3 | 24                | 28.2 |        |
| Retired                                | 11            | 9.1  | 5                        | 13.9 | 6                 | 7.1  |        |
| Medical insurance                      |               |      |                          |      |                   |      | 0.6939 |
| Private                                | 69            | 58.5 | 19                       | 54.3 | 50                | 60.2 |        |
| Public                                 | 15            | 12.7 | 4                        | 11.4 | 11                | 13.3 |        |
| None                                   | 34            | 28.8 | 12                       | 34.3 | 22                | 26.5 |        |
| Marital status                         |               |      |                          |      |                   |      | 0.8991 |
| Single                                 | 33            | 27.0 | 9                        | 25.0 | 24                | 27.9 |        |
| Married or cohabiting                  | 49            | 40.2 | 16                       | 44.4 | 33                | 38.4 |        |
| Divorced or separated                  | 34            | 27.9 | 10                       | 27.8 | 24                | 27.9 |        |
| Widowed                                | 6             | 4.9  | 1                        | 2.8  | 5                 | 5.8  |        |
| Recurrent depression                   | 80            | 72.7 | 24                       | 75.0 | 56                | 71.8 | 0.7317 |
| Family history of depression           | 69            | 58.0 | 18                       | 50.0 | 51                | 61.4 | 0.2452 |
| Anxious features                       |               |      | 8                        | 25.8 | 25                | 32.5 | 0.4966 |
| Atypical features                      |               |      | 6                        | 19.4 | 14                | 18.4 | 0.9105 |
| Melancholic features                   |               |      | 5                        | 16.1 | 12                | 15.6 | 1.0000 |
| Prior suicide attempt                  | 21            | 17.4 | 6                        | 16.7 | 15                | 17.6 | 0.8964 |
| Psychiatric Diagnostic Screening       |               |      |                          |      |                   |      | 0.6449 |
| Questionnaire, number of comorbidities |               |      |                          |      |                   |      |        |
| 1                                      | 49            | 41.2 | 15                       | 42.9 | 34                | 40.5 |        |
| 2                                      | 34            | 28.6 | 12                       | 34.3 | 22                | 26.2 |        |
| 3                                      | 16            | 13.4 | 3                        | 8.6  | 13                | 15.5 |        |
| ≥4                                     | 20            | 16.8 | 5                        | 14.3 | 15                | 17.9 |        |
| Psychiatric care                       | 67            | 54.9 | 20                       | 55.6 | 47                | 54.7 | 0.9270 |
| Duration of index episode ≥2 years     | 26            | 21.5 | 7                        | 19.4 | 19                | 22.4 | 0.7218 |
| Age <18 at first episode               | 48            | 40.0 | 14                       | 40.0 | 34                | 40.0 | 1.0000 |
|                                        | Mean          | SD   | Mean                     | SD   | Mean              | SD   |        |
| Age                                    | 42.0          | 13.7 | 43.4                     | 14.7 | 41.5              | 13.3 | 0.4790 |
| Education (years)                      | 14.3          | 3.2  | 14.5                     | 3.1  | 14.2              | 3.3  | 0.7130 |
| Monthly household income (\$)          | 2,273         | 1976 | 1,526                    | 1331 | 2,582             | 2120 | 0.0172 |
| Age at first episode                   | 24.5          | 14.9 | 25.2                     | 16.5 | 24.3              | 14.3 | 0.9516 |
| Duration of illness (years)            | 17.6          | 14.4 | 18.0                     | 14.8 | 17.5              | 14.3 | 0.8352 |
| Number of episodes                     | 8.5           | 16.7 | 8.7                      | 18.8 | 8.4               | 16.0 | 0.8016 |
| Cumulative Illness Rating Scale        |               |      |                          |      |                   |      |        |
| Number of categories                   | 3.1           | 2.1  | 2.8                      | 1.8  | 3.2               | 2.2  | 0.4062 |
| Total score                            | 4.5           | 3.5  | 3.9                      | 2.8  | 4.8               | 3.8  | 0.3974 |
| Severity index                         | 1.3           | 0.6  | 1.2                      | 0.6  | 1.3               | 0.6  | 0.5351 |
| Duration of index episode (months)     | 23.8          | 48.4 | 17.4                     | 31.2 | 26.5              | 54.0 | 0.4698 |

**Extended TABLE 4 (Continued)**

| Characteristic                                                                | Switch Option |    |                          |      |                   |      | p      |
|-------------------------------------------------------------------------------|---------------|----|--------------------------|------|-------------------|------|--------|
|                                                                               | Total (N=122) |    | Cognitive Therapy (N=36) |      | Medication (N=86) |      |        |
|                                                                               | Mean          | SD | Mean                     | SD   | Mean              | SD   |        |
| Quality of Life and Enjoyment Satisfaction Questionnaire score                |               |    | 43.3                     | 14.7 | 45.5              | 13.4 | 0.4634 |
| Short Form Health Survey (12-item)                                            |               |    |                          |      |                   |      |        |
| Mental symptoms                                                               |               |    | 29.5                     | 10.3 | 32.5              | 9.0  | 0.1524 |
| Physical symptoms                                                             |               |    | 47.1                     | 10.4 | 45.3              | 12.0 | 0.4675 |
| Work and Social Adjustment Scale score <sup>b</sup>                           |               |    | 24.6                     | 8.8  | 20.9              | 7.7  | 0.0308 |
| Hamilton Rating Scale for Depression score                                    |               |    | 16.4                     | 6.2  | 17.7              | 6.6  | 0.3492 |
| Inventory of Depressive Symptomatology—Clinician Rating score                 |               |    | 29.4                     | 10.2 | 31.6              | 11.9 | 0.3683 |
| Quick Inventory of Depressive Symptomatology—Clinician Rating (16-item) score |               |    | 11.9                     | 3.6  | 13.5              | 4.5  | 0.0761 |
| Quick Inventory of Depressive Symptomatology—Self-Rating (16-item) Score      |               |    | 11.2                     | 4.3  | 12.1              | 4.6  | 0.3282 |
| Change during Level 1 (%)                                                     |               |    | 7.4                      | 54.7 | 7.3               | 41.6 | 0.5567 |
|                                                                               |               |    | N                        | %    | N                 | %    |        |
| Met remission criteria during Level 1                                         |               |    | 5                        | 13.9 | 7                 | 8.1  | 0.3344 |
| Maximum side effect frequency in Level 1                                      |               |    |                          |      |                   |      | 0.0676 |
| No side effects                                                               |               |    | 4                        | 15.4 | 1                 | 1.6  |        |
| 10–25% of the time                                                            |               |    | 1                        | 3.8  | 8                 | 12.7 |        |
| 50–75% of the time                                                            |               |    | 9                        | 34.6 | 21                | 33.3 |        |
| 90–100% of the time                                                           |               |    | 12                       | 46.2 | 33                | 52.4 |        |
| Maximum side effect intensity in Level 1                                      |               |    |                          |      |                   |      | 0.0466 |
| No side effects                                                               |               |    | 4                        | 15.4 | 1                 | 1.6  |        |
| Minimal to mild                                                               |               |    | 1                        | 3.8  | 6                 | 9.5  |        |
| Moderate to marked                                                            |               |    | 8                        | 30.8 | 29                | 46.0 |        |
| Severe to intolerable                                                         |               |    | 13                       | 50.0 | 27                | 42.9 |        |
| Maximum side effect burden in Level 1                                         |               |    |                          |      |                   |      | 0.0603 |
| No side effects                                                               |               |    | 4                        | 15.4 | 1                 | 1.6  |        |
| Minimal to mild                                                               |               |    | 3                        | 11.5 | 14                | 22.2 |        |
| Moderate to marked                                                            |               |    | 11                       | 42.3 | 32                | 50.8 |        |
| Severe to intolerable                                                         |               |    | 8                        | 30.8 | 16                | 25.4 |        |
| Exited Level 1 because of intolerance                                         |               |    | 20                       | 55.6 | 52                | 60.5 | 0.6150 |

<sup>a</sup> Sums do not always equal N because of missing values. Percentages are based on available data.

<sup>b</sup> A higher score denotes less impairment.
