# Supplementary material for: Cognitive Therapy Versus Medication in Augmentation and Switch Strategies as Second-Step Treatments: A STAR*D Report
Source: Atypon-hosted journal article supplement (doi:10.1176/ajp.2007.164.5.739), 2007-05-01
Supplement: ajp_164_5_739_02.pdf [file ajp_164_5_739_02.pdf]

## *The STAR\*D Study Investigators*

### **National Coordinating Center**

A.J. Rush, M.D.; M. Trivedi, M.D.; D. Warden, Ph.D., Man.A; M.M. Biggs, Ph.D.; K. Shores-Wilson, Ph.D.; D. Stegman, R.N.C.; M. Kashner, Ph.D., J.D. *Research outcome assessors*: M.F. Lay, B.A.; I. Garza, M.A.; E. Soriano, M.A.; M. Mollett, B.A.; B. Keilers, B.A.; A. Bradley-Carson, B.S.; M. Resendez, M.S.

### **Data Coordinating Center**

S. Wisniewski, Ph.D.; G.K. Balasubramani, Ph.D.; J. Luther, M.A.; H. Eng, B.A.

### **STAR\*D Regional Centers**

*Alabama*: Tuscaloosa Veterans Affairs Medical Center, Tuscaloosa, and Birmingham Veterans Affairs Medical Center, Birmingham (L. Davis, M.D.; K. Rice, M.S.W.; S. Ambrose, R.N.; M. Jewell, M.A.; B. Thomas, M.S.W.; E. Waldrop, R.N.C.; E. Frazier; R. Williams, Pharm.D.; B.English).

*California*: University of California, Los Angeles (A. Leuchter, M.D.; I. Lesser, M.D.; I. Cook, M.D.; M. Epstein, R.N., N.P.; S. Rosenberg, M.N., R.N., C.N.S.; S. Zeim, B.S.; L. Sulkowski, B.S.; J. Iribarren, Psy.D.; R. Armstrong, B.S.; A. Rosales, M.A.; M. Abrams, B.S.N.); University of California, San Diego (S. Zisook, M.D.; A. Albala, M.D.; C. Gonzalez, M.D.; M. Smith, R.N.; C. Lawrence, M.F.S.; J. Palica, M.D.; M. Rohrs, B.A.; K. Ganadjian, M.D.; T. Dresselhaus, M.D.; T. Schwartz, M.D.; S. Shuchter, M.D.).

*Illinois*: Northwestern University Medical School, Chicago (W. McKinney, M.D.; W. Gilmer, M.D.; C. Kelley, R.N.C.; C. Cooler, R.N.; A. Bauer, M.A.; J. Fleck,

M.N., R.N., C.N.P.; C. Endick, M.S.W.; M. Karaffa, M.S.; D. Yohanna, M.D.; K. Kreiner, M.D.; R. Manev, M.D.; C. Carmin, Ph.D.).

*Kansas:* University of Kansas, Wichita, and Clinical Research Institute (S. Preskorn, M.D.; A. Khan, M.D.; D. Hilger, L.P.N.; A. Klick-Davis, B.S.N.; J. Elmore, B.S.N.; D. Soetaert, B.A.).

*Massachusetts:* Massachusetts General Hospital, Boston (J. Alpert, M.D.; M. Fava, M.D.; A. Nierenberg, M.D.; A. Farabaugh, Ph.D.; T. Petersen, Ph.D.; W. Merens, M.A.; P. Cassano, M.D.; N. Craven, M.D.; H. Yang, M.D.; M. Candrian, M.S.; R. Fraguas, M.D., Ph.D.).

*Michigan:* University of Michigan, Ann Arbor (E. Young, M.D.; M. Klinkman, M.D.; S. Marcus, M.D.; J. Greden, M.D.; H. Briggs, M.S.W.; K. Bullard, M.S.W., M.P.H.; A. Kennedy, B.S.; A. Benway, B.S.; K. Kerber, M.D.).

*New York:* New York State Psychiatric Institute and Columbia College of Physicians and Surgeons (F.M. Quitkin, M.D.; P.J. McGrath, M.D.; J.W. Stewart, M.D.; H. Sackeim, Ph.D.; K. Tate-Brown, M.S., N.P.P., C.C.R.C.; S. Rees, R.N., M.S.N., C.S.; C. Smith, M.S., C.S., N.P.P.; A. Couraud, B.S.N., R.N.; J. Lavelle, M.S.; K. Broderick, B.S.W.).

*North Carolina:* University of North Carolina, Chapel Hill (R. Golden, M.D.; Bradley Gaynes, M.D.; J. DeVeaugh-Geiss, M.A., L.P.A.; A. Ford, M.A.; S. Barnett, M.D.; B. Pearson, P.-L.C.S.W.).

*Oklahoma:* Laureate Health care System, Tulsa, (J. Mitchell, M.D.; W. Yates, M.D.; J. Kuehnert, R.N., C.C.R.C.; L. Jernigan, R.N.; B. Williams, MS, R.N.; J. Hilton, R.N.; R. Hauger, M.D.; D. Mitchell, M.D.).

*Pennsylvania:* University of Pittsburgh Medical Center, Pittsburgh (M. Thase, M.D.; R.H. Howland, M.D.; E. Friedman, M.D.; J. Callan, R.N., M.S.N.; S. Berman, M.D.; L. Shutt, R.N., M.S.N.; C. Spotts, M.D.).

*Tennessee:* Vanderbilt University Medical Center, Nashville (S. Hollon, Ph.D.; R. Shelton, M.D.; M. Lovett, M.D.; T. Crutcher, R.N.; T. Patton, M.A.; J. Hart, B.S.; R.M. Harris-Turner, R.N., M.S.N.; D. Lilly, M.S.S.W.; B. Sirles, M.P.H.; S. Hicks, R.N., M.S.N.; N. Harris; S. Addington, M.A.).

*Texas:* University of Texas Southwestern Medical Center, Dallas (M. Husain, M.D.; M. Downing, M.D.; D. Stegman, R.N.C.; S. McClintock, MS; B. O'Neal, R.N., B.S.N.; L. MacLeod, R.N., C.C.R.C.; M. Henson, R.N., B.S.N.; T. Hawley, R.N., B.S.N., C.C.R.C.; S. Gardner, M.S.).

*Virginia:* Virginia Commonwealth University, Richmond (S. Kornstein, M.D.; R. Schneider, M.D.; S. Belyea, Ph.D.; B. Perry, M.S.; K. Schmitt, B.A.; T. Goff, L.C.S.W., C.C.R.C.; K. Lamoree, M.A.; M. Britton, R.N., B.S.N.; C. Glassman, B.S.).
